# Supplementary material for: Surface-modified iron oxide nanoprobes in biomedical scaffolds
Source: Royal Society of Chemistry journal article supplement (doi:10.1039/d5na00605h), 2025-01-01
Supplement: d5na00605h1.pdf [file d5na00605h1.pdf]

## Supplementary information

### Surface-Modified Iron Oxide Nanoprobes in Biomedical Scaffolds

M. A. González-Gómez<sup>a,†</sup>, Á. Arnosa-Prieto<sup>a,†</sup>, P. García-Acevedo<sup>a</sup>, P. Díaz-Rodríguez<sup>b</sup>, L. de Castro-Alves<sup>a</sup>, Y. Piñeiro<sup>a</sup> and J. Rivas<sup>a,\*</sup>.

<sup>a</sup> NANOMAG Laboratory, Applied Physics Department, Materials Institute (iMATUS) and Health Research Institute (IDIS), Universidade de Santiago de Compostela, Santiago de Compostela, 15782, Spain.

<sup>b</sup> I+D Pharma Group (GI-1645), Department of Pharmacology, Pharmacy, and Pharmaceutical Technology, Institute of Materials (iMATUS), Universidade de Santiago de Compostela, Santiago de Compostela, 15782, Spain.

\*Corresponding authors. E-mails: manuelantonio.gonzalez@usc.es (M.A. González-Gómez), jose.rivas@usc.es (J. Rivas).

† These authors are considered as co-first authors.

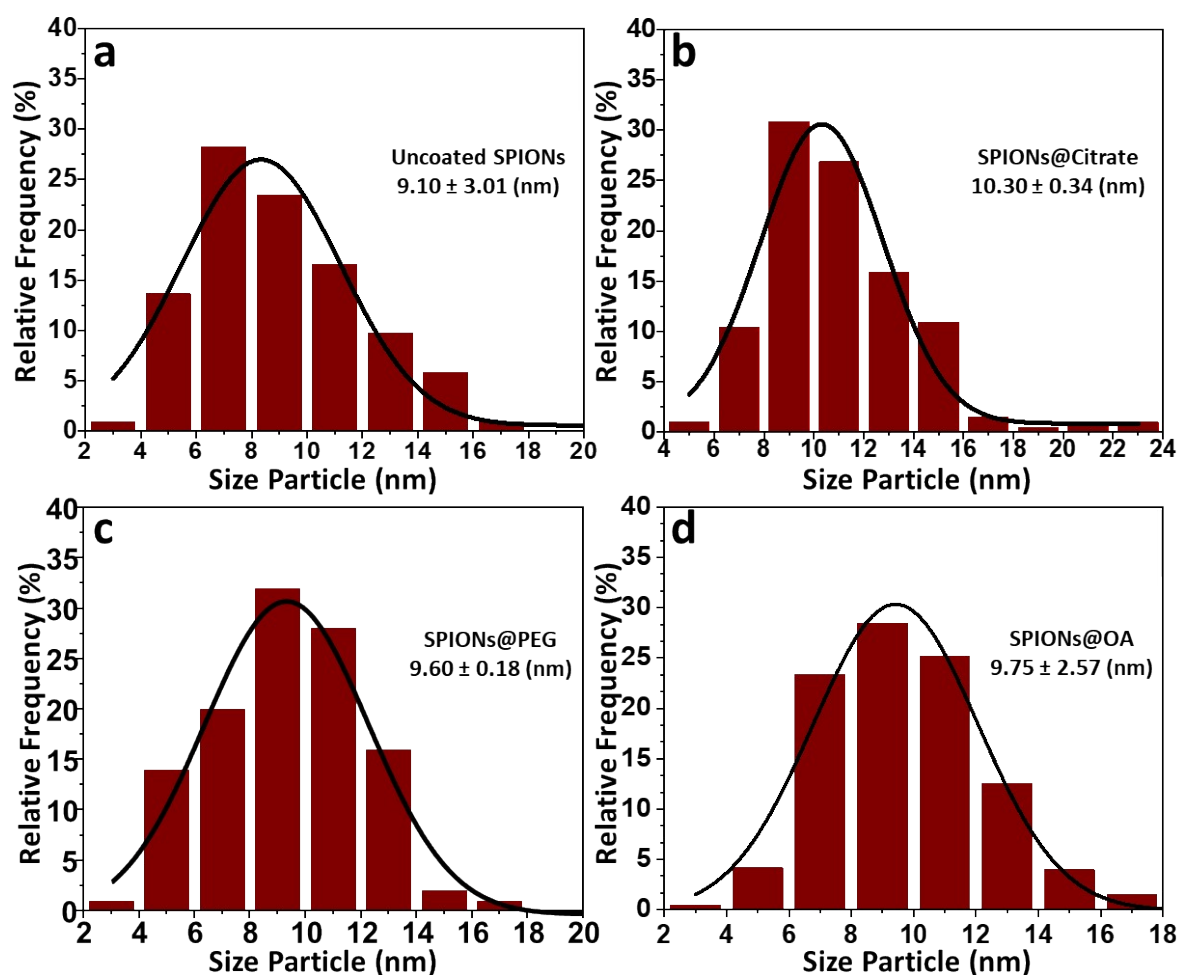

**Figure S1:** Size distribution histograms of single-core: (a) uncoated and surface-functionalized with (b) citrate, (c) PEG and (d) OA single-core SPIONs.

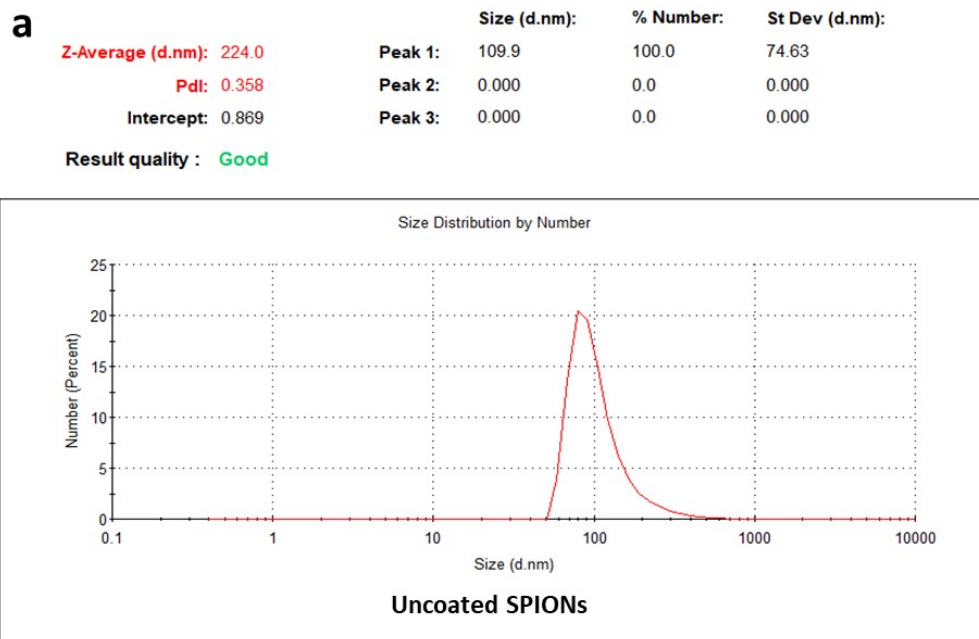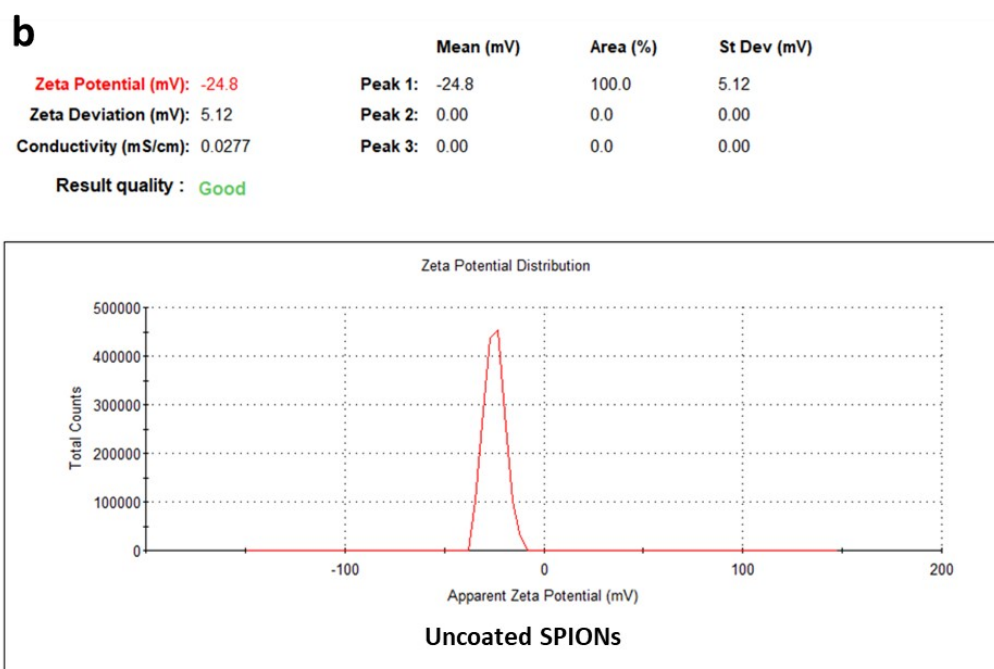

**Figure S2:** Dynamic Light Scattering measurements of uncoated SPIONs: (a) Size Distributions by Number and (b) Zeta Potential Distributions.

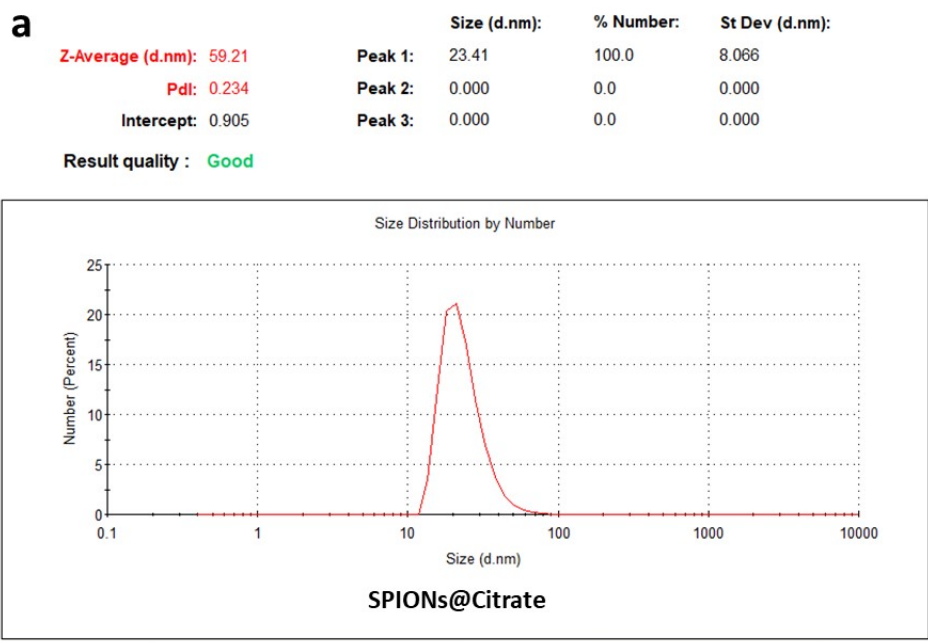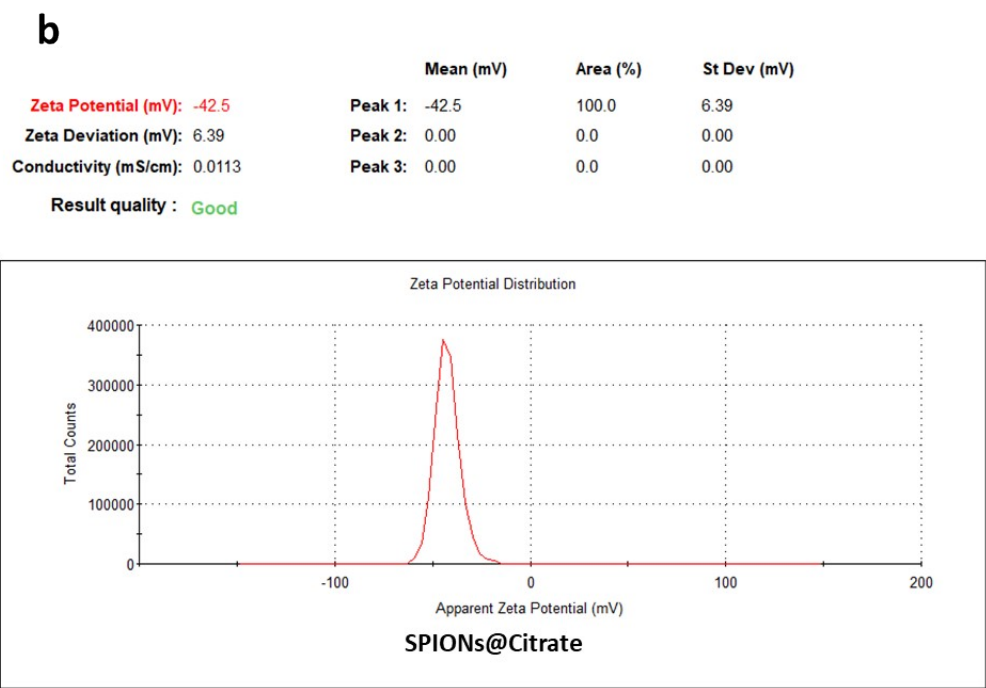

**Figure S3:** Dynamic Light Scattering measurements of SPIONs@Citrate: (a) Size Distributions by Number and (b) Zeta Potential Distributions.

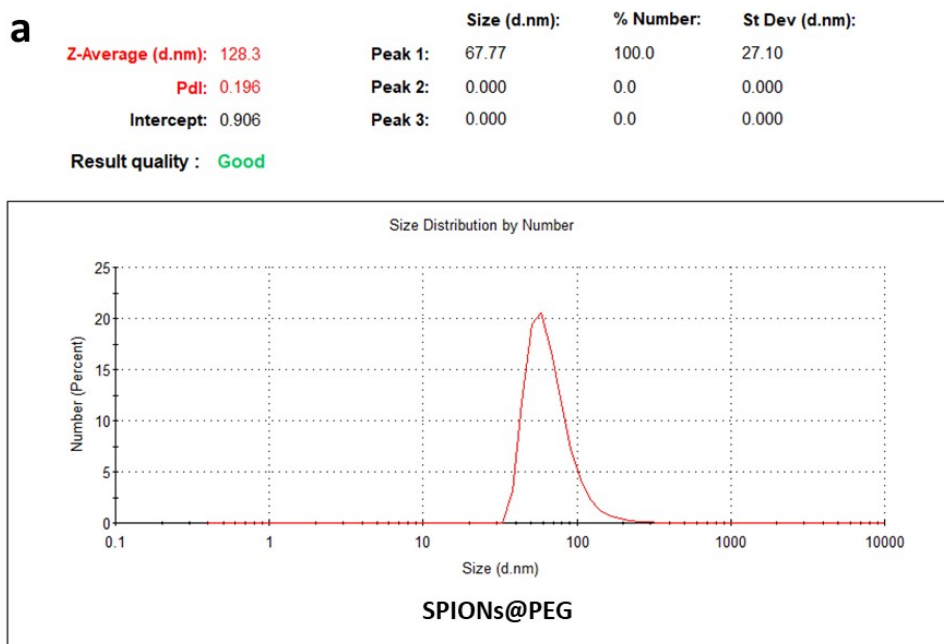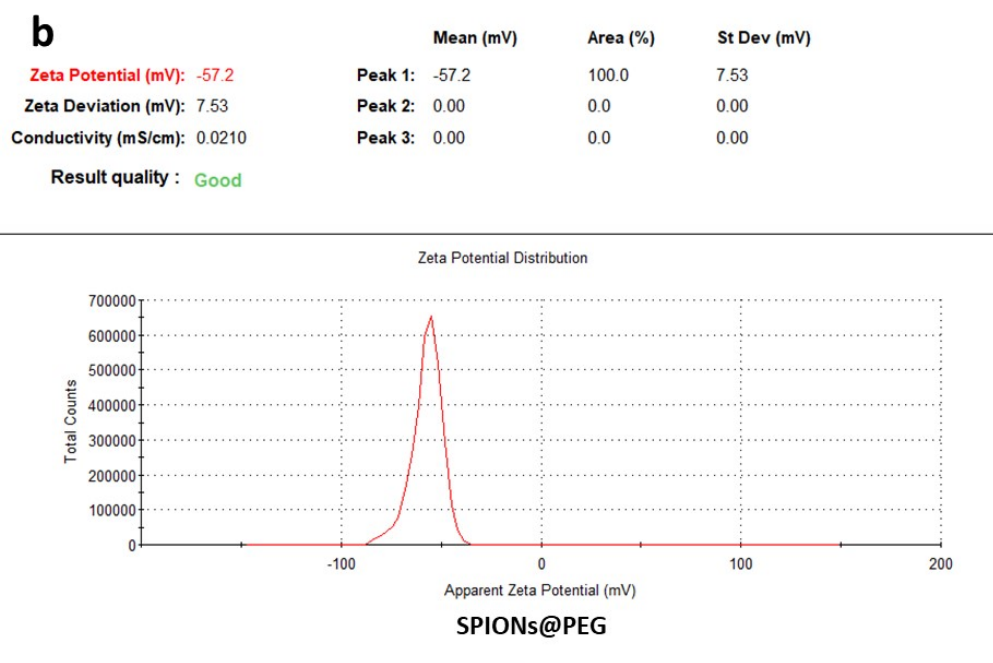

**Figure S4:** Dynamic Light Scattering measurements of SPIONs@PEG: (a) Size Distributions by Number and (b) Zeta Potential Distributions.

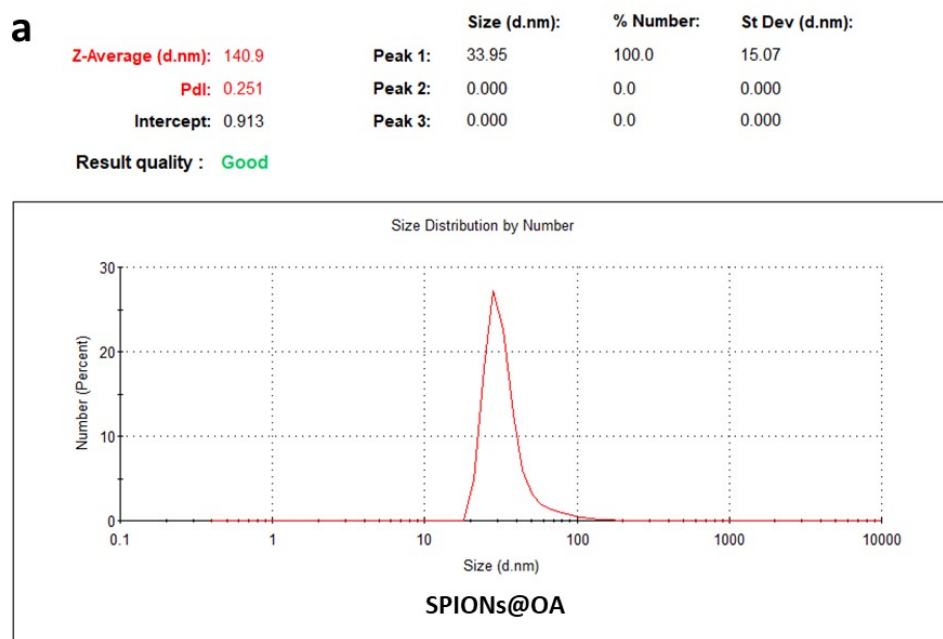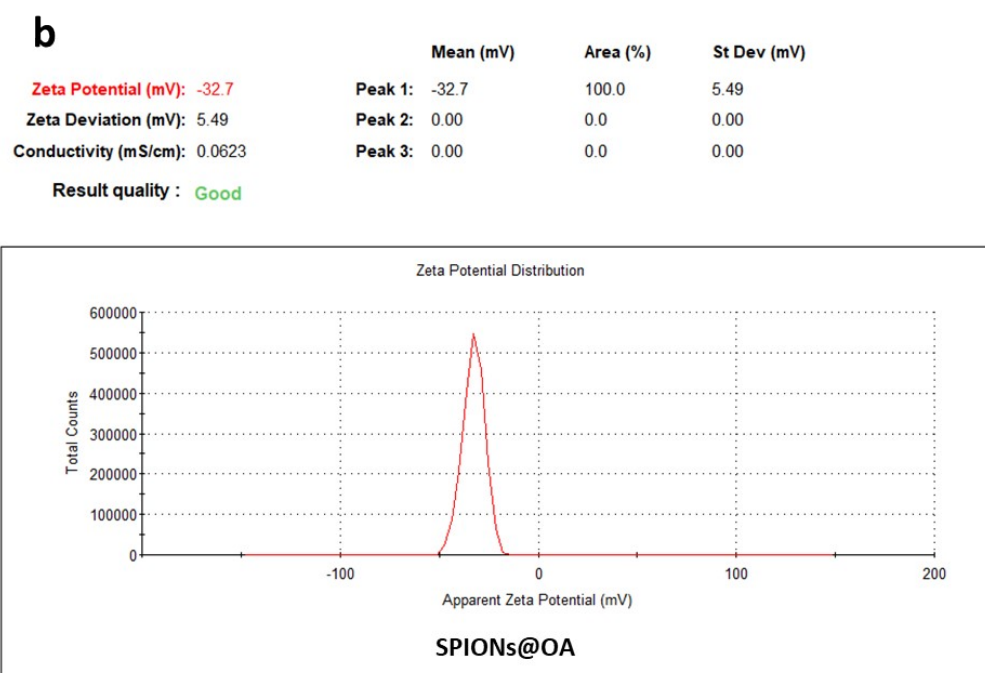

**Figure S5:** Dynamic Light Scattering measurements of SPIONs@OA: (a) Size Distributions by Number and (b) Zeta Potential Distributions.

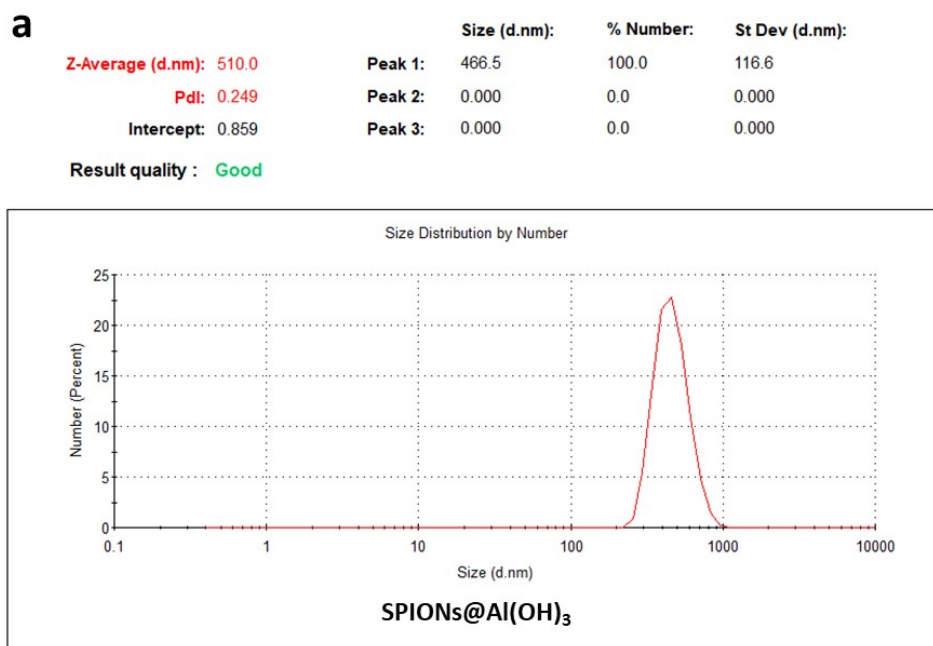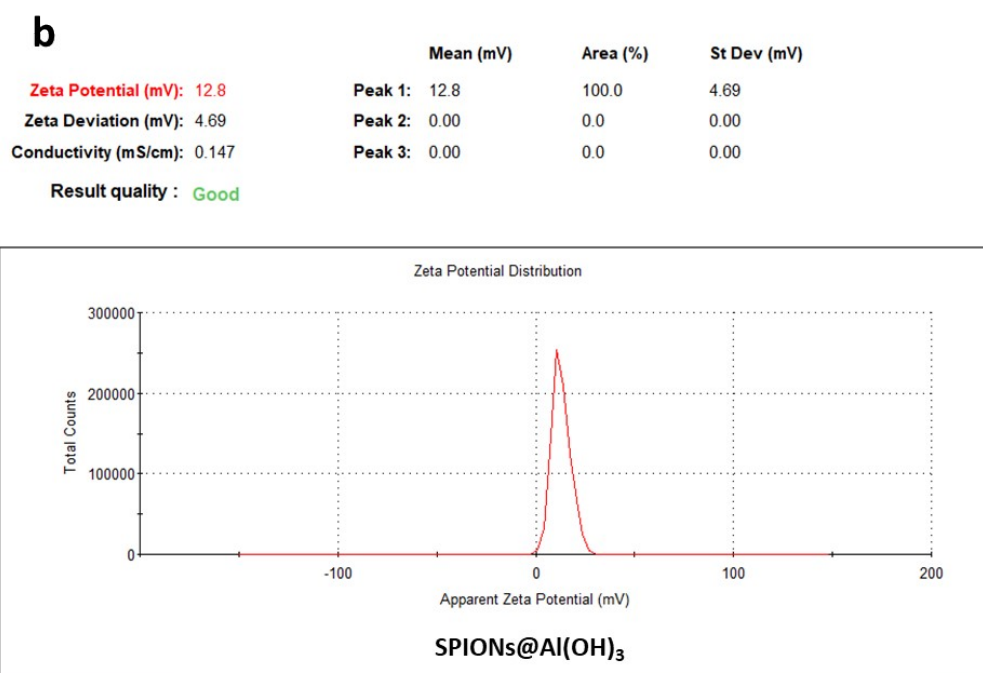

**Figure S6:** Dynamic Light Scattering measurements of SPIONs@Al(OH)<sub>3</sub>: (a) Size Distributions by Number and (b) Zeta Potential Distributions.
